# Supplementary material for: Global and regional estimates of maternal near miss: a systematic review, meta-analysis and experiences with application
Source: PubMed Central journal article supplement — BMJ Glob Health. 2022 Apr 6;7(4):e007077. doi: 10.1136/bmjgh-2021-007077 (PMC8987675; doi:10.1136/bmjgh-2021-007077), 2022-04-06
Supplement: bmjgh-2021-007077supp001.pdf [file bmjgh-2021-007077supp001.pdf]

**Table S1:** Study characteristics [N=60]

| Study            | Country (Study Period)  | Setting                                     | Study Design                  | No. Deaths | No. Near Miss | No. Deliveries | No. Live Births | % Near Miss | Near Miss/Mortality Rate |
|------------------|-------------------------|---------------------------------------------|-------------------------------|------------|---------------|----------------|-----------------|-------------|--------------------------|
| Brown 2011       | USA (1994-2005)         | Teaching hospital                           | Cross-sectional retrospective | 5          | 612           | 12774          | --              | 4.79        | 122.40                   |
| Cecatti 2011     | Brazil (2002-2007)      | Tertiary care hospital                      | Cross-sectional retrospective | 18         | 194           | --             | 14413           | 1.35        | 10.78                    |
| Jayarathnam 2011 | New Zealand (2009-2010) | Referral hospital                           | Cross-sectional prospective   | --         | 17            | --             | 2833            | 0.60        | --                       |
| Morse 2011       | Brazil (2009)           | Tertiary care hospital                      | Cross-sectional prospective   | 3          | 10            | --             | 1069            | 0.94        | 3.33                     |
| Jabir 2013       | Iraq (2010)             | Various public hospitals (municipal)        | Cross-sectional prospective   | 16         | 129           | --             | 25472           | 0.51        | 8.06                     |
| Lobato 2013      | Brazil (2008)           | Maternity hospital                          | Cross-sectional retrospective | 8          | 27            | --             | 812             | 3.33        | 3.38                     |
| Nelissen 2013    | Tanzania (2009-2011)    | Referral hospital                           | Cross-sectional prospective   | 32         | 216           | 9471           | --              | 2.28        | 6.75                     |
| Oliveira 2013    | Brazil (2007-2010)      | Tertiary care Hospital                      | Cross-sectional retrospective | --         | 255           | --             | 19940           | 1.28        | --                       |
| Ps 2013          | India (2011-2012)       | Tertiary care hospital                      | Cross-sectional prospective   | 23         | 131           | 7390           | --              | 1.77        | 5.70                     |
| Rana 2013        | Nepal (2012)            | Various tertiary care hospitals (municipal) | Cross-sectional prospective   | 26         | 157           | --             | 41676           | 0.38        | 6.04                     |

**Table S1:** Study characteristics [N=60]

| Study      | Country (Study Period)           | Setting                      | Study Design                  | No. Deaths | No. Near Miss | No. Deliveries | No. Live Births | % Near Miss | Near Miss/Mortality Rate |
|------------|----------------------------------|------------------------------|-------------------------------|------------|---------------|----------------|-----------------|-------------|--------------------------|
| Shen 2013  | China (2008-2012)                | Teaching hospital            | Cross-sectional retrospective | 3          | 69            | --             | 18104           | 0.38        | 23.00                    |
| Souza 2013 | (2010-2011)                      | Various hospitals (national) | Cross-sectional prospective   |            |               |                |                 |             |                          |
|            | Afghanistan                      |                              |                               | 19         | 421           | --             | 25227           | 1.67        | 22.16                    |
|            | Angola                           |                              |                               | 35         | 57            | --             | 9966            | 0.57        | 1.63                     |
|            | Argentina                        |                              |                               | 9          | 51            | --             | 9729            | 0.52        | 5.67                     |
|            | Brazil                           |                              |                               | 1          | 17            | --             | 7019            | 0.24        | 17.00                    |
|            | Cambodia                         |                              |                               | 5          | 59            | --             | 4635            | 1.27        | 11.80                    |
|            | China                            |                              |                               | 0          | 34            | --             | 13242           | 0.26        | --                       |
|            | Democratic Republic of the Congo |                              |                               | 27         | 88            | --             | 8395            | 1.05        | 3.26                     |
|            | Ecuador                          |                              |                               | 9          | 30            | --             | 10108           | 0.30        | 3.33                     |
|            | India                            |                              |                               | 109        | 174           | --             | 30094           | 0.58        | 1.60                     |
|            | Japan                            |                              |                               | 0          | 21            | --             | 3527            | 0.60        | --                       |
|            | Jordan                           |                              |                               | 0          | 5             | --             | 1158            | 0.43        | --                       |
|            | Kenya                            |                              |                               | 55         | 77            | --             | 19658           | 0.39        | 1.40                     |
|            | Lebanon                          |                              |                               | 2          | 18            | --             | 4008            | 0.45        | 9.00                     |
|            | Mexico                           |                              |                               | 4          | 153           | --             | 13167           | 1.16        | 38.25                    |
|            | Mongolia                         |                              |                               | 1          | 61            | --             | 7303            | 0.84        | 61.00                    |
|            | Nepal                            |                              |                               | 8          | 65            | --             | 10999           | 0.59        | 8.13                     |
|            | Nicaragua                        |                              |                               | 6          | 119           | --             | 6426            | 1.85        | 19.83                    |
|            | Nigeria                          |                              |                               | 73         | 298           | --             | 11775           | 2.53        | 4.08                     |

**Table S1:** Study characteristics [N=60]

| Study            | Country (Study Period)         | Setting                      | Study Design              | No. Deaths | No. Near Miss | No. Deliveries | No. Live Births | % Near Miss | Near Miss/Mortality Rate |
|------------------|--------------------------------|------------------------------|---------------------------|------------|---------------|----------------|-----------------|-------------|--------------------------|
|                  | Occupied Palestinian Territory |                              |                           | 0          | 3             | --             | 975             | 0.31        | --                       |
|                  | Pakistan                       |                              |                           | 38         | 94            | --             | 12729           | 0.74        | 2.47                     |
|                  | Paraguay                       |                              |                           | 3          | 8             | --             | 3595            | 0.22        | 2.67                     |
|                  | Peru                           |                              |                           | 6          | 169           | --             | 15021           | 1.13        | 28.17                    |
|                  | Philippines                    |                              |                           | 12         | 29            | --             | 10609           | 0.27        | 2.42                     |
|                  | Qatar                          |                              |                           | 0          | 14            | --             | 3932            | 0.36        | --                       |
|                  | Sri Lanka                      |                              |                           | 3          | 73            | --             | 17988           | 0.41        | 24.33                    |
|                  | Thailand                       |                              |                           | 2          | 51            | --             | 8894            | 0.57        | 25.50                    |
|                  | Uganda                         |                              |                           | 32         | 120           | --             | 10467           | 1.15        | 3.75                     |
|                  | Viet Nam                       |                              |                           | 0          | 33            | --             | 15411           | 0.21        | --                       |
| Abalos 2014      | Argentina (2012)               | Various hospitals (regional) | Cross-sectional           | 7          | 28            | --             | 6024            | 0.46        | 4                        |
| Aziz 2014        | India (2011-2012)              | Referral hospital            | Prospective observational | 6          | 103           | --             | 13219           | 0.77        | 17.17                    |
| Bastos Dias 2014 | Brazil (2011-2012)             | Various hospitals (national) | Cross-sectional           | 684        | 23747         | --             | 2325394         | 1.02        | 34.72                    |
| Galvão 2014      | Brazil (2011-2012)             | Various hospitals (regional) | Cross-sectional           | 17         | 77            | --             | 16243           | 0.47        | 4.53                     |
| Litorp 2014      | Tanzania (2012)                | Various hospitals (regional) | Cross-sectional           | 77         | 467           | --             | 13121           | 3.55        | 6.06                     |

**Table S1:** Study characteristics [N=60]

| Study           | Country (Study Period)                                | Setting                        | Study Design                | No. Deaths       | No. Near Miss       | No. Deliveries       | No. Live Births              | % Near Miss                  | Near Miss/ Mortality Rate |
|-----------------|-------------------------------------------------------|--------------------------------|-----------------------------|------------------|---------------------|----------------------|------------------------------|------------------------------|---------------------------|
| Luexay 2014     | Laos (2011)                                           | Various hospitals (regional)   | Prospective descriptive     | 2                | 11                  | --                   | 1123                         | 0.98                         | 5.5                       |
| Pandey 2014     | India (2011-2012)                                     | University hospital            | Retrospective               | 247              | 633                 | --                   | 5273                         | 12.0                         | 2.56                      |
| Tunçalp 2014    | Ghana (2010-2011)                                     | Tertiary care hospital         | Prospective cohort          | 37               | 94                  | --                   | 3206                         | 2.93                         | 2.54                      |
| Bashour 2015    | (2012-2013)<br>Egypt<br>Lebanon<br>Palestine<br>Syria | Various hospitals (national)   | Cross-sectional             | 3<br>0<br>0<br>3 | 32<br>5<br>16<br>18 | --<br>--<br>--<br>-- | 2641<br>1171<br>1244<br>4007 | 1.21<br>0.43<br>1.29<br>0.45 | 11.83<br>--<br>--<br>6.00 |
| Cecatti 2016    | Brazil (2009-2010)                                    | Various hospitals (national)   | Cross-sectional prospective | 140              | 770                 | --                   | 82144                        | 0.94                         | 5.50                      |
| Karolinski 2015 | Argentina (2013-2014)                                 | Various hospitals (national)   | Prevalence                  | 8                | 67                  | --                   | 9921                         | 0.68                         | 8.38                      |
| Kulkarni 2015   | India (2012-2013)                                     | Tertiary hospitals (regional)  | Prospective observational   | 94               | 668                 | --                   | 14508                        | 4.60                         | 7.11                      |
| Madeiro 2015    | Brazil (2012-2013)                                    | Tertiary hospital (regional)   | Transversal                 | 10               | 56                  | --                   | 5841                         | 0.96                         | 5.60                      |
| Menezes 2015    | Brazil (2011-2012)                                    | Reference hospitals (regional) | Cross-sectional prospective | 17               | 77                  | --                   | 16243                        | 0.47                         | 4.53                      |

**Table S1:** Study characteristics [N=60]

| Study            | Country (Study Period)   | Setting                      | Study Design                  | No. Deaths | No. Near Miss | No. Deliveries | No. Live Births | % Near Miss | Near Miss/Mortality Rate |
|------------------|--------------------------|------------------------------|-------------------------------|------------|---------------|----------------|-----------------|-------------|--------------------------|
| Naderi 2015      | Iran (2013)              | Various hospitals (regional) | Prospective                   | 2          | 501           | --             | 19908           | 2.52        | 250.50                   |
| Oladapo 2015     | Nigeria (2012-2013)      | Various hospitals (national) | Cross-sectional prospective   | 998        | 1451          | --             | 91724           | 1.58        | 1.45                     |
| Rulisa 2015      | Rwanda (2011-2012)       | Teaching tertiary hospital   | Cross-sectional prospective   | 50         | 142           | --             | 1739            | 8.17        | 2.84                     |
| Shahid 2015      | Pakistan (2014)          | Tertiary hospital (regional) | Retrospective                 | 7          | 124           | --             | 2371            | 5.23        | 17.71                    |
| Soma-Pillay 2015 | South Africa (2013-2014) | Various hospitals (regional) | Descriptive population- based | 19         | 117           | 26614          | --              | 0.44        | 6.16                     |
| Abha 2016        | India (2013-2015)        | University hospital          | Prospective observational     | 102        | 211           | --             | 13895           | 1.52        | 2.07                     |
| De Mucio 2016    | (2013)                   | Various hospitals (national) | Cross-sectional prospective   |            |               |                |                 |             |                          |
|                  | Argentina                |                              |                               | 0          | 2             | --             | 762             | 0.26        | --                       |
|                  | Colombia                 |                              |                               | 0          | 3             | --             | 334             | 0.90        | --                       |
|                  | Dominican Republic       |                              |                               | 0          | 3             | --             | 133             | 2.26        | --                       |
|                  | Ecuador                  |                              |                               | 0          | 2             | --             | 228             | 0.88        | --                       |

**Table S1:** Study characteristics [N=60]

| Study              | Country (Study Period) | Setting                       | Study Design                  | No. Deaths | No. Near Miss | No. Deliveries | No. Live Births | % Near Miss | Near Miss/Mortality Rate |
|--------------------|------------------------|-------------------------------|-------------------------------|------------|---------------|----------------|-----------------|-------------|--------------------------|
|                    | Honduras               |                               |                               | 1          | 10            | --             | 613             | 1.63        | 10.00                    |
|                    | Nicaragua              |                               |                               | 0          | 4             | --             | 477             | 0.84        | --                       |
|                    | Paraguay               |                               |                               | 1          | 2             | --             | 334             | 0.60        | 2.00                     |
|                    | Peru                   |                               |                               | 0          | 11            | --             | 315             | 3.49        | --                       |
| El Ghardallou 2016 | Tunisia (2012)         | Tertiary care hospital        | Cross-sectional retrospective | 1          | 58            | --             | 9890            | 0.59        | 58.00                    |
| Ghazivakili 2016   | Iran (2012)            | Various hospitals (regional)  | Cross-sectional prospective   | 7          | 192           | --             | 38663           | 0.50        | 27.43                    |
| Jayaratnam 2016    | Australia (2014-2015)  | Tertiary teaching hospital    | Prospective observational     | 1          | 10            | --             | 2080            | 0.48        | 10.00                    |
| Kalisa 2016        | Rwanda (2013-2014)     | Provincial referral hospital  | Prospective cohort            | 13         | 86            | --             | 3994            | 2.15        | 6.62                     |
| Nakimuli 2016      | Uganda (2013-2014)     | Referral hospitals (national) | Prospective cohort            | 130        | 695           | --             | 25840           | 2.69        | 5.35                     |
| Nanda 2016         | India (2012-2014)      | Tertiary hospitals (national) | Prospective observational     | 60         | 184           | --             | 13851           | 1.33        | 3.07                     |

**Table S1:** Study characteristics [N=60]

| Study          | Country (Study Period)       | Setting                       | Study Design                    | No. Deaths | No. Near Miss | No. Deliveries | No. Live Births | % Near Miss | Near Miss/Mortality Rate |
|----------------|------------------------------|-------------------------------|---------------------------------|------------|---------------|----------------|-----------------|-------------|--------------------------|
| Norhayati 2016 | Malaysia (2014)              | Tertiary hospitals (national) | Cross-sectional prospective     | 2          | 47            | 21579          | --              | 0.22        | 23.50                    |
| Parmar 2016    | India (2012)                 | Tertiary care hospital        | Cross-sectional prospective     | 18         | 40            | --             | 1929            | 2.07        | 2.22                     |
| Rathod 2016    | India (2011-2013)            | Tertiary care hospital        | Cohort retrospective            | 66         | 161           | --             | 22092           | 0.73        | 2.44                     |
| Tanimia 2016   | Papua New Guinea (2012-2013) | Teaching hospital             | Prospective observational       | 9          | 122           | --             | 13338           | 0.91        | 13.56                    |
| Akrawi 2017    | Iraq (2013)                  | Tertiary care hospital        | Cross-sectional prospective     | 11         | 142           | --             | 17353           | 0.82        | 12.91                    |
| Bolnga 2017    | Papua New Guinea (2014-2016) | Provincial hospital           | Prospective observational study | 10         | 153           | --             | 6019            | 2.54        | 15.30                    |
| Herklots 2017  | Tanzania (2016)              | Tertiary care hospital        | Cross-sectional prospective     | 28         | 37            | --             | 4125            | 0.90        | 1.32                     |
| Liyew 2017     | Ethiopia (2015-2016)         | Various hospitals (regional)  | Cross-sectional prospective     | --         | 238           | 29697          | --              | 0.80        | --                       |

**Table S1:** Study characteristics [N=60]

| Study                 | Country (Study Period)   | Setting                      | Study Design                  | No. Deaths | No. Near Miss | No. Deliveries | No. Live Births | % Near Miss | Near Miss/Mortality Rate |
|-----------------------|--------------------------|------------------------------|-------------------------------|------------|---------------|----------------|-----------------|-------------|--------------------------|
| Mbachu 2017           | Nigeria (2014-2015)      | Referral hospital            | Cross-sectional prospective   | 5          | 52            | 262            | --              | 19.85       | 10.40                    |
| Serruya 2017          | Multicountry (2009-2012) | Various hospitals (national) | Cross-sectional retrospective | 1028       | 21985         | 697820         | --              | 3.15        | 21.39                    |
| Chikadaya 2018        | Zimbabwe                 | Various hospitals (regional) | Prospective descriptive       | 13         | 110           | 11871          | --              | 0.92        | 8.46                     |
| Esparza-Valencia 2018 | Mexico (2016)            | Secondary care hospital      | Cross sectional Retrospective | 5          | 362           | --             | 4691            | 7.72        | 72.4                     |
| Iwuh 2018             | South Africa (2014)      | Various hospitals (regional) | Retrospective observational   | 13         | 112           | 19222          | --              | 0.58        | 8.62                     |
| Jayarathnam 2018      | Australia                | University hospital          | Prospective observational     | 0          | 19            | --             | 2773            | 0.69        | --                       |
| Rana 2018             | Nepal (2015)             | Various hospitals (regional) | Mixed methods                 | 1          | 21            | --             | 1386            | 1.52        | 21                       |
| Reena 2018            | India                    | University hospital          | Cross-sectional               | 5          | 32            | --             | 3451            | 0.92        | 6.4                      |
| Schwenck 2018         | Brazil (2017-2018)       | High-risk maternity          | Cross-sectional prospective   | 4          | 51            | --             | 1493            | 3.42        | 12.75                    |
| Sheriar 2018          | India                    | Tertiary care hospital       | Prospective observational     | 15         | 250           | --             | 8070            | 3.09        | 16.67                    |



**Table S1:** Study characteristics [N=60]

| Study            | Country (Study Period) | Setting                      | Study Design                | No. Deaths | No. Near Miss | No. Deliveries | No. Live Births | % Near Miss | Near Miss/Mortality Rate |
|------------------|------------------------|------------------------------|-----------------------------|------------|---------------|----------------|-----------------|-------------|--------------------------|
| Tura 2018        | Ethiopia (2016-2017)   | Referral hospital            | Prospective cohort          | 26         | 128           | --             | 7404            | 1.73        | 4.92                     |
| Verschueren 2018 | Suriname (2017)        | Various hospitals (national) | Prospective cohort          | 4          | 32            | --             | 3330            | 0.96        | 8                        |
| Woldeyes 2018    | Ethiopia               | Referral hospital            | Prospective cross-sectional | 24         | 138           | --             | 2737            | 5.04        | 5.75                     |

**Table S2:** Quality assessment [N=60 studies]

| STUDY NAME                                                                                                                            | FIRST AUTHOR/ YEAR | Was the research question or objective in this paper clearly stated? | Was the study population clearly specified and defined? | Was the participation rate of eligible persons at least 50%? | Were all the subjects selected or recruited from the same or similar populations (including the same time period)? | Were inclusion and exclusion criteria for being in the study prespecified and applied uniformly to all participants? | Was a sample size justification, power description, or variance and effect estimates provided? | Quality Rating (Good, Fair, or Poor) |
|---------------------------------------------------------------------------------------------------------------------------------------|--------------------|----------------------------------------------------------------------|---------------------------------------------------------|--------------------------------------------------------------|--------------------------------------------------------------------------------------------------------------------|----------------------------------------------------------------------------------------------------------------------|------------------------------------------------------------------------------------------------|--------------------------------------|
| Near miss maternal mortality in a multiethnic population                                                                              | Brown 2011         | Yes                                                                  | Yes                                                     | Yes                                                          | Yes                                                                                                                | Yes                                                                                                                  | Not Reported                                                                                   | Good                                 |
| Pre-validation of the WHO organ dysfunction based criteria for identification of maternal near miss                                   | Cecatti 2011       | Yes                                                                  | Yes                                                     | Yes                                                          | Yes                                                                                                                | Yes                                                                                                                  | Not Reported                                                                                   | Good                                 |
| Developing an assessment tool for maternal morbidity 'near-miss'- a prospective study in a large Australian regional hospital         | Jayarathnam 2011   | Yes                                                                  | Yes                                                     | Yes                                                          | Yes                                                                                                                | Yes                                                                                                                  | Not Reported                                                                                   | Good                                 |
| Severe maternal morbidity and near misses in a regional reference hospital.                                                           | Morse 2011         | Yes                                                                  | Yes                                                     | Yes                                                          | Yes                                                                                                                | Yes                                                                                                                  | Not Reported                                                                                   | Good                                 |
| Severe acute maternal morbidity: use of the Brazilian Hospital Information System.                                                    | Magalhaes 2012     | Yes                                                                  | Yes                                                     | Yes                                                          | Yes                                                                                                                | Yes                                                                                                                  | Not Reported                                                                                   | Good                                 |
| Maternal near miss and quality of maternal health care in Baghdad, Iraq.                                                              | Jabir 2013         | Yes                                                                  | Yes                                                     | Yes                                                          | Yes                                                                                                                | Yes                                                                                                                  | Not Reported                                                                                   | Good                                 |
| Comparing different diagnostic approaches to severe maternal morbidity and near-miss: a pilot study in a Brazilian tertiary hospital. | Lobato 2013        | Yes                                                                  | Yes                                                     | Yes                                                          | Yes                                                                                                                | Yes                                                                                                                  | Not Reported                                                                                   | Good                                 |
| Maternal near miss and mortality in a rural referral hospital in Northern Tanzania: a cross-sectional study.                          | Nelissen 2013      | Yes                                                                  | Yes                                                     | Yes                                                          | Yes                                                                                                                | Yes                                                                                                                  | Not Reported                                                                                   | Good                                 |
| Fetal and neonatal deaths among cases of maternal near miss                                                                           | Oliveira 2013      | Yes                                                                  | Yes                                                     | Yes                                                          | Yes                                                                                                                | Yes                                                                                                                  | Yes                                                                                            | Good                                 |

**Table S2:** Quality assessment [N=60 studies]

| STUDY NAME                                                                                                                                                      | FIRST AUTHOR/ YEAR | Was the research question or objective in this paper clearly stated? | Was the study population clearly specified and defined? | Was the participation rate of eligible persons at least 50%? | Were all the subjects selected or recruited from the same or similar populations (including the same time period)? | Were inclusion and exclusion criteria for being in the study prespecified and applied uniformly to all participants? | Was a sample size justification, power description, or variance and effect estimates provided? | Quality Rating (Good, Fair, or Poor) |
|-----------------------------------------------------------------------------------------------------------------------------------------------------------------|--------------------|----------------------------------------------------------------------|---------------------------------------------------------|--------------------------------------------------------------|--------------------------------------------------------------------------------------------------------------------|----------------------------------------------------------------------------------------------------------------------|------------------------------------------------------------------------------------------------|--------------------------------------|
| Near miss" obstetric events and maternal deaths in a tertiary care hospital: an audit.                                                                          | Ps 2013            | Yes                                                                  | Yes                                                     | Yes                                                          | Yes                                                                                                                | Yes                                                                                                                  | Not Reported                                                                                   | Good                                 |
| Maternal near-miss: A multicenter surveillance in Kathmandu valley                                                                                              | Rana 2013          | Yes                                                                  | Cannot Determine                                        | Yes                                                          | Cannot Determine                                                                                                   | Yes                                                                                                                  | Not Reported                                                                                   | Fair                                 |
| Factors associated with maternal near-miss morbidity and mortality in Kowloon Hospital, Suzhou, China                                                           | Shen 2013          | Yes                                                                  | Yes                                                     | Yes                                                          | Yes                                                                                                                | Yes                                                                                                                  | Not Reported                                                                                   | Good                                 |
| Moving beyond essential interventions for reduction of maternal mortality (the WHO Multicountry Survey on Maternal and Newborn Health): a cross-sectional study | Souza 2013         | Yes                                                                  | Yes                                                     | Yes                                                          | Yes                                                                                                                | Yes                                                                                                                  | Yes                                                                                            | Good                                 |
| Assessment of maternal near miss and quality of care in a hospital-based study in Accra, Ghana                                                                  | Tuncalp 2013       | Yes                                                                  | Yes                                                     | Yes                                                          | Yes                                                                                                                | Yes                                                                                                                  | Yes                                                                                            | Good                                 |
| Morbilidad severa materna y neonatal: vigilancia en servicios y capacidad de respuesta del sistema de salud                                                     | Abalos 2014        | Yes                                                                  | Yes                                                     | Yes                                                          | Yes                                                                                                                | Yes                                                                                                                  | No                                                                                             | Fair                                 |
| Comparison of etiology of maternal near miss in a tertiary referral centre in booked and referred population                                                    | Aziz 2014          | Yes                                                                  | Yes                                                     | Yes                                                          | Yes                                                                                                                | Yes                                                                                                                  | No                                                                                             | Fair                                 |
| Incidence of maternal near miss in hospital childbirth and postpartum: Data from the Birth in Brazil study                                                      | Bastos Dias 2014   | Yes                                                                  | Yes                                                     | Yes                                                          | No                                                                                                                 | Yes                                                                                                                  | Yes                                                                                            | Good                                 |

**Table S2:** Quality assessment [N=60 studies]

| STUDY NAME                                                                                                                                                                    | FIRST AUTHOR/ YEAR | Was the research question or objective in this paper clearly stated? | Was the study population clearly specified and defined? | Was the participation rate of eligible persons at least 50%? | Were all the subjects selected or recruited from the same or similar populations (including the same time period)? | Were inclusion and exclusion criteria for being in the study prespecified and applied uniformly to all participants? | Was a sample size justification, power description, or variance and effect estimates provided? | Quality Rating (Good, Fair, or Poor) |
|-------------------------------------------------------------------------------------------------------------------------------------------------------------------------------|--------------------|----------------------------------------------------------------------|---------------------------------------------------------|--------------------------------------------------------------|--------------------------------------------------------------------------------------------------------------------|----------------------------------------------------------------------------------------------------------------------|------------------------------------------------------------------------------------------------|--------------------------------------|
| The prevalence of severe maternal morbidity and near miss and associated factors in Sergipe, Northeast Brazil                                                                 | Galvão 2014        | Yes                                                                  | Yes                                                     | Yes                                                          | Yes                                                                                                                | Yes                                                                                                                  | No                                                                                             | Fair                                 |
| Maternal near-miss and death and their association with caesarean section complications: A cross sectional study at a university hospital and a regional hospital in Tanzania | Litorp 2014        | Yes                                                                  | Yes                                                     | Yes                                                          | Yes                                                                                                                | Yes                                                                                                                  | No                                                                                             | Fair                                 |
| Maternal near-miss and mortality in Sayaboury Province, Lao PDR                                                                                                               | Luexay 2014        | Yes                                                                  | Yes                                                     | Yes                                                          | Yes                                                                                                                | Yes                                                                                                                  | No                                                                                             | Fair                                 |
| Evaluation of Obstetric Near Miss and Maternal Deaths in a Tertiary Care Hospital in North India: Shifting Focus from Mortality to Morbidity                                  | Pandey 2014        | Yes                                                                  | Yes                                                     | Yes                                                          | Yes                                                                                                                | Yes                                                                                                                  | No                                                                                             | Fair                                 |
| A cross sectional study of maternal 'near-miss' cases in major public hospitals in Egypt, Lebanon, Palestine and Syria.                                                       | Bashour 2015       | Yes                                                                  | Yes                                                     | Yes                                                          | Yes                                                                                                                | Yes                                                                                                                  | Not Reported                                                                                   | Good                                 |
| Network for Surveillance of Severe Maternal Morbidity: a powerful national collaboration generating data on maternal health outcomes and care                                 | Cecatti 2016       | Yes                                                                  | Yes                                                     | Yes                                                          | Yes                                                                                                                | Yes                                                                                                                  | Yes                                                                                            | Good                                 |
| Bases para establecer un sistema de vigilancia activa y respuesta rápida para el manejo de la morbilidad materna severa.                                                      | Karolinski 2015    | Yes                                                                  | Yes                                                     | Yes                                                          | Yes                                                                                                                | Yes                                                                                                                  | Not Reported                                                                                   | Good                                 |

**Table S2:** Quality assessment [N=60 studies]

| STUDY NAME                                                                                                                                                            | FIRST AUTHOR/ YEAR | Was the research question or objective in this paper clearly stated? | Was the study population clearly specified and defined? | Was the participation rate of eligible persons at least 50%? | Were all the subjects selected or recruited from the same or similar populations (including the same time period)? | Were inclusion and exclusion criteria for being in the study prespecified and applied uniformly to all participants? | Was a sample size justification, power description, or variance and effect estimates provided? | Quality Rating (Good, Fair, or Poor) |
|-----------------------------------------------------------------------------------------------------------------------------------------------------------------------|--------------------|----------------------------------------------------------------------|---------------------------------------------------------|--------------------------------------------------------------|--------------------------------------------------------------------------------------------------------------------|----------------------------------------------------------------------------------------------------------------------|------------------------------------------------------------------------------------------------|--------------------------------------|
| Prospective observational study of near-miss obstetric events at two tertiary hospitals in Mumbai, Maharashtra, India                                                 | Kulkarni 2015      | Yes                                                                  | Yes                                                     | Yes                                                          | Yes                                                                                                                | Yes                                                                                                                  | Not Reported                                                                                   | Good                                 |
| Incidence and determinants of severe maternal morbidity: a transversal study in a referral hospital in Teresina, Piaui, Brazil.                                       | Madeiro 2015       | Yes                                                                  | Yes                                                     | Yes                                                          | Yes                                                                                                                | Yes                                                                                                                  | Not Reported                                                                                   | Good                                 |
| Similarities and differences between WHO criteria and two other approaches for maternal near miss diagnosis                                                           | Menezes 2015       | Yes                                                                  | Yes                                                     | Yes                                                          | Yes                                                                                                                | Yes                                                                                                                  | Not Reported                                                                                   | Good                                 |
| Incidence and correlates of maternal near miss in southeast Iran.                                                                                                     | Naderi 2015        | Yes                                                                  | Yes                                                     | Yes                                                          | Yes                                                                                                                | Yes                                                                                                                  | Not Reported                                                                                   | Good                                 |
| When getting there is Not enough: a nationwide cross-sectional study of 998 maternal deaths and 1451 near-misses in public tertiary hospitals in a low-income country | Oladapo 2015       | Yes                                                                  | Yes                                                     | Yes                                                          | Yes                                                                                                                | Yes                                                                                                                  | Not Reported                                                                                   | Good                                 |
| Maternal near miss and mortality in a tertiary care hospital in Rwanda                                                                                                | Rulisa 2015        | Yes                                                                  | Yes                                                     | Yes                                                          | Yes                                                                                                                | Yes                                                                                                                  | No                                                                                             | Good                                 |
| Near miss events frequency and most common causes.                                                                                                                    | Shahid 2015        | No                                                                   | No                                                      | Yes                                                          | Yes                                                                                                                | Yes                                                                                                                  | No                                                                                             | Poor                                 |
| Maternal near miss and maternal death in the Pretoria Academic Complex, South Africa: A population-based study                                                        | Soma-Pillay 2015   | Yes                                                                  | Yes                                                     | Yes                                                          | Yes                                                                                                                | Yes                                                                                                                  | No                                                                                             | Fair                                 |

**Table S2:** Quality assessment [N=60 studies]

| STUDY NAME                                                                                                                                | FIRST AUTHOR/ YEAR | Was the research question or objective in this paper clearly stated? | Was the study population clearly specified and defined? | Was the participation rate of eligible persons at least 50%? | Were all the subjects selected or recruited from the same or similar populations (including the same time period)? | Were inclusion and exclusion criteria for being in the study prespecified and applied uniformly to all participants? | Was a sample size justification, power description, or variance and effect estimates provided? | Quality Rating (Good, Fair, or Poor) |
|-------------------------------------------------------------------------------------------------------------------------------------------|--------------------|----------------------------------------------------------------------|---------------------------------------------------------|--------------------------------------------------------------|--------------------------------------------------------------------------------------------------------------------|----------------------------------------------------------------------------------------------------------------------|------------------------------------------------------------------------------------------------|--------------------------------------|
| Maternal Near Miss: A Valuable Contribution in Maternal Care.                                                                             | Abha 2016          | Yes                                                                  | No                                                      | Yes                                                          | Yes                                                                                                                | Yes                                                                                                                  | No                                                                                             | Poor                                 |
| Maternal near miss and predictive ability of potentially life-threatening conditions at selected maternity hospitals in Latin America.    | De Mucio 2016      | Yes                                                                  | Yes                                                     | Yes                                                          | Yes                                                                                                                | Yes                                                                                                                  | No                                                                                             | Fair                                 |
| Maternal Near Miss and Quality of Obstetric Care in a Tunisian Tertiary Level Maternity.                                                  | El Ghardallou 2016 | Yes                                                                  | Yes                                                     | Yes                                                          | Yes                                                                                                                | Yes                                                                                                                  | No                                                                                             | Fair                                 |
| Maternal near miss approach to evaluate quality of care in Alborz province, Iran.                                                         | Ghazivakili 2016   | Yes                                                                  | Yes                                                     | Yes                                                          | Yes                                                                                                                | Yes                                                                                                                  | Yes                                                                                            | Good                                 |
| Maternal 'near miss' at Royal Darwin Hospital: An analysis of severe maternal morbidity at an Australian regional tertiary maternity unit | Jayaratnam 2016    | Yes                                                                  | Yes                                                     | Yes                                                          | Yes                                                                                                                | Yes                                                                                                                  | No                                                                                             | Fair                                 |
| Maternal Near Miss and quality of care in a rural Rwandan hospital                                                                        | Kalisa 2016        | Yes                                                                  | Yes                                                     | Yes                                                          | Yes                                                                                                                | Yes                                                                                                                  | No                                                                                             | Fair                                 |
| Maternal near misses from two referral hospitals in Uganda: a prospective cohort study on incidence, determinants and prognostic factors  | Nakimuli 2016      | Yes                                                                  | Yes                                                     | Yes                                                          | Yes                                                                                                                | Yes                                                                                                                  | Yes                                                                                            | Good                                 |
| A prospective observational study of near miss events and maternal deaths in a tertiary hospital in India [Conference Abstract]           | Nanda 2016         | Yes                                                                  | Yes                                                     | Yes                                                          | Yes                                                                                                                | Yes                                                                                                                  | No                                                                                             | Fair                                 |

**Table S2:** Quality assessment [N=60 studies]

| STUDY NAME                                                                                                                 | FIRST AUTHOR/ YEAR | Was the research question or objective in this paper clearly stated? | Was the study population clearly specified and defined? | Was the participation rate of eligible persons at least 50%? | Were all the subjects selected or recruited from the same or similar populations (including the same time period)? | Were inclusion and exclusion criteria for being in the study prespecified and applied uniformly to all participants? | Was a sample size justification, power description, or variance and effect estimates provided? | Quality Rating (Good, Fair, or Poor) |
|----------------------------------------------------------------------------------------------------------------------------|--------------------|----------------------------------------------------------------------|---------------------------------------------------------|--------------------------------------------------------------|--------------------------------------------------------------------------------------------------------------------|----------------------------------------------------------------------------------------------------------------------|------------------------------------------------------------------------------------------------|--------------------------------------|
| Severe maternal morbidity and near misses in tertiary hospitals, Kelantan, Malaysia: a cross-sectional study.              | Norhayati 2016     | Yes                                                                  | Yes                                                     | Yes                                                          | Yes                                                                                                                | Yes                                                                                                                  | Yes                                                                                            | Good                                 |
| Incidence of Maternal "Near-Miss" Events in a Tertiary Care Hospital of Central Gujarat, India.                            | Parmar 2016        | Yes                                                                  | Cannot Determine                                        | Yes                                                          | Yes                                                                                                                | Yes                                                                                                                  | No                                                                                             | Poor                                 |
| Analysis of near-miss and maternal mortality at tertiary referral centre of rural India.                                   | Rathod 2016        | No                                                                   | Yes                                                     | Yes                                                          | Yes                                                                                                                | Yes                                                                                                                  | No                                                                                             | Poor                                 |
| Near-misses at the Port Moresby General Hospital: a descriptive study                                                      | Tanimia 2016       | Yes                                                                  | Yes                                                     | Yes                                                          | Yes                                                                                                                | Yes                                                                                                                  | No                                                                                             | Fair                                 |
| Major Determinants of Maternal Near-Miss and Mortality at the Maternity Teaching Hospital, Erbil city, Iraq.               | Akrawi 2017        | Yes                                                                  | Yes                                                     | Yes                                                          | Yes                                                                                                                | Yes                                                                                                                  | No                                                                                             | Fair                                 |
| Maternal near-misses at a provincial hospital in Papua New Guinea: A prospective observational study                       | Bolnga 2017        | Yes                                                                  | Yes                                                     | Yes                                                          | Yes                                                                                                                | Yes                                                                                                                  | No                                                                                             | Fair                                 |
| Severe maternal morbidity in Zanzibar's referral hospital: Measuring the impact of in hospital care                        | Herklots 2017      | Yes                                                                  | Yes                                                     | Yes                                                          | Yes                                                                                                                | Yes                                                                                                                  | Yes                                                                                            | Good                                 |
| Maternal near-miss audit in the Metro West maternity service, Cape Town, South Africa: A retrospective observational study | Iwuh 2017          | Yes                                                                  | Yes                                                     | Yes                                                          | Yes                                                                                                                | Yes                                                                                                                  | Yes                                                                                            | Good                                 |
| Incidence and causes of maternal near-miss in selected hospitals of Addis Ababa, Ethiopia.                                 | Liyew 2017         | Yes                                                                  | Yes                                                     | Yes                                                          | Yes                                                                                                                | Yes                                                                                                                  | Yes                                                                                            | Good                                 |

**Table S2:** Quality assessment [N=60 studies]

| STUDY NAME                                                                                                                                   | FIRST AUTHOR/ YEAR    | Was the research question or objective in this paper clearly stated? | Was the study population clearly specified and defined? | Was the participation rate of eligible persons at least 50%? | Were all the subjects selected or recruited from the same or similar populations (including the same time period)? | Were inclusion and exclusion criteria for being in the study prespecified and applied uniformly to all participants? | Was a sample size justification, power description, or variance and effect estimates provided? | Quality Rating (Good, Fair, or Poor) |
|----------------------------------------------------------------------------------------------------------------------------------------------|-----------------------|----------------------------------------------------------------------|---------------------------------------------------------|--------------------------------------------------------------|--------------------------------------------------------------------------------------------------------------------|----------------------------------------------------------------------------------------------------------------------|------------------------------------------------------------------------------------------------|--------------------------------------|
| A cross sectional study of maternal near miss and mortality at a rural tertiary centre in southern Nigeria                                   | Mbachu 2017           | Yes                                                                  | Yes                                                     | Yes                                                          | Yes                                                                                                                | Yes                                                                                                                  | No                                                                                             | Fair                                 |
| Exploring the Concept of Degrees of Maternal Morbidity as a Tool for Surveillance of Maternal Health in Latin American and Caribbean Setting | Serruya 2017          | Yes                                                                  | Yes                                                     | Yes                                                          | Yes                                                                                                                | Yes                                                                                                                  | No                                                                                             | Fair                                 |
| Incidence of maternal near miss in the public health sector of Harare, Zimbabwe: a prospective descriptive study                             | Chikadaya 2018        | Yes                                                                  | Yes                                                     | Yes                                                          | Yes                                                                                                                | Yes                                                                                                                  | No                                                                                             | Fair                                 |
| Prevalence of extreme maternal morbidity in a second-level hospital in san luis potosí, méxico.                                              | Esparza Valencia 2018 | Yes                                                                  | Yes                                                     | Yes                                                          | Yes                                                                                                                | Yes                                                                                                                  | Yes                                                                                            | Good                                 |
| Maternal 'near miss' collection at an Australian tertiary maternity hospital                                                                 | Jayarathnam 2018      | Yes                                                                  | Yes                                                     | Yes                                                          | Yes                                                                                                                | Yes                                                                                                                  | No                                                                                             | Fair                                 |
| Assessing maternal and neonatal near-miss reviews in rural Nepal: an implementation research study to inform scale-up                        | Rana 2018             | Yes                                                                  | Yes                                                     | Yes                                                          | Yes                                                                                                                | Yes                                                                                                                  | No                                                                                             | Fair                                 |
| Factors associated with maternal near miss: A study from Kerala                                                                              | Reena 2018            | Yes                                                                  | Yes                                                     | Yes                                                          | Yes                                                                                                                | Yes                                                                                                                  | No                                                                                             | Fair                                 |
| A cross sectional study of maternal near miss cases at a high-risk maternity in Brazil                                                       | Schwenck 2018         | Yes                                                                  | Yes                                                     | Yes                                                          | Yes                                                                                                                | Yes                                                                                                                  | No                                                                                             | Fair                                 |
| Maternal near miss in a tertiary care hospital                                                                                               | Sheriar 2018          | Yes                                                                  | Yes                                                     | Yes                                                          | Yes                                                                                                                | Yes                                                                                                                  | No                                                                                             | Fair                                 |



**Table S2:** Quality assessment [N=60 studies]

| STUDY NAME                                                                                                                                            | FIRST AUTHOR/ YEAR | Was the research question or objective in this paper clearly stated? | Was the study population clearly specified and defined? | Was the participation rate of eligible persons at least 50%? | Were all the subjects selected or recruited from the same or similar populations (including the same time period)? | Were inclusion and exclusion criteria for being in the study prespecified and applied uniformly to all participants? | Was a sample size justification, power description, or variance and effect estimates provided? | Quality Rating (Good, Fair, or Poor) |
|-------------------------------------------------------------------------------------------------------------------------------------------------------|--------------------|----------------------------------------------------------------------|---------------------------------------------------------|--------------------------------------------------------------|--------------------------------------------------------------------------------------------------------------------|----------------------------------------------------------------------------------------------------------------------|------------------------------------------------------------------------------------------------|--------------------------------------|
| Severe maternal outcomes in eastern Ethiopia: Application of the adapted maternal near miss tool                                                      | Tura 2018          | Yes                                                                  | Yes                                                     | Yes                                                          | Yes                                                                                                                | Yes                                                                                                                  | No                                                                                             | Fair                                 |
| Severe maternal morbidity & near-miss in suriname-interim of prospective national cohort study                                                        | Verschueren 2018   | Yes                                                                  | Yes                                                     | Yes                                                          | Yes                                                                                                                | Yes                                                                                                                  | No                                                                                             | Fair                                 |
| Incidence and determinants of severe maternal outcome in Jimma University teaching hospital, south-West Ethiopia: A prospective cross-sectional study | WoldeYes 2018      | Yes                                                                  | Yes                                                     | Yes                                                          | Yes                                                                                                                | Yes                                                                                                                  | Yes                                                                                            | Good                                 |

**Table S3:** Near miss frequency per 1000 live births\* by SDG Region [N=60 studies]

| Country                                 | Near miss frequency (range) | No. of studies** |
|-----------------------------------------|-----------------------------|------------------|
| <b>Central and Southern Asia</b>        |                             |                  |
| Afghanistan                             | 1.67                        | 1                |
| India                                   | 5.8 - 120                   | 11               |
| Iran                                    | 5.0 - 25.2                  | 2                |
| Nepal                                   | 3.8 - 15.2                  | 3                |
| Pakistan                                | 7.4 - 52.3                  | 2                |
| Sri Lanka                               | 4.1                         | 1                |
| <b>Eastern and South Eastern Asia</b>   |                             |                  |
| Cambodia                                | 12.7                        | 1                |
| China                                   | 2.6 - 3.8                   | 2                |
| Japan                                   | 6.0                         | 1                |
| Laos                                    | 9.8                         | 1                |
| Malaysia                                | 2.2                         | 1                |
| Mongolia                                | 8.4                         | 1                |
| Philippines                             | 2.7                         | 1                |
| Thailand                                | 5.7                         | 1                |
| Vietnam                                 | 2.1                         | 1                |
| <b>Sub Saharan Africa</b>               |                             |                  |
| Angola                                  | 5.7                         | 1                |
| Democratic Republic of the Congo        | 15.0                        | 1                |
| Ethiopia                                | 8.0 - 50.4                  | 3                |
| Ghana                                   | 29.3                        | 1                |
| Kenya                                   | 0.39                        | 1                |
| Niger                                   | 18.3                        | 1                |
| Nigeria                                 | 15.8 - 198.5                | 3                |
| Rwanda                                  | 21.5 - 81.7                 | 2                |
| South Africa                            | 4.4 - 5.8                   | 2                |
| Tanzania                                | 9.0 - 35.5                  | 3                |
| Uganda                                  | 11.5 - 26.9                 | 2                |
| Zimbabwe                                | 9.2                         | 1                |
| <b>Latin America and the Caribbean</b>  |                             |                  |
| Argentina                               | 2.6 - 6.8                   | 4                |
| Brazil                                  | 2.4 - 34.2                  | 11               |
| Colombia                                | 9.0                         | 1                |
| Dominican Republic                      | 22.6                        | 1                |
| Ecuador                                 | 3.0 - 8.8                   | 2                |
| Honduras                                | 16.3                        | 1                |
| Mexico                                  | 11.6- 77.2                  | 2                |
| Nicaragua                               | 8.4 - 18.5                  | 2                |
| Paraguay                                | 2.2 - 6.0                   | 2                |
| Peru                                    | 11.3- 34.9                  | 2                |
| Suriname                                | 9.6                         | 1                |
| <b>Northern Africa and Western Asia</b> |                             |                  |
| Egypt                                   | 12.1                        | 1                |
| Iraq                                    | 5.1-8.2                     | 2                |
| Jordan                                  | 4.3                         | 1                |
| Lebanon                                 | 4.3- 4.5                    | 2                |
| Occupied Palestinian Territory          | 3.1 to 12.9                 | 2                |

**Table S3:** Near miss frequency per 1000 live births by SDG Region [N=60 studies]

| Country                            | Near miss frequency (range) | No. of studies |
|------------------------------------|-----------------------------|----------------|
| Qatar                              | 3.6                         | 1              |
| Syria                              | 4.5                         | 1              |
| Tunisia                            | 5.9                         | 1              |
| <b>Oceania</b>                     |                             |                |
| Australia                          | 4.8- 6.9                    | 2              |
| New Zealand                        | 6.0                         | 1              |
| Papua New Guinea                   | 9.1- 25.4                   | 2              |
| <b>Europe and Northern America</b> |                             |                |
| USA                                | 47.9                        | 1              |

\*except 10 studies which reported number of deliveries

\*\* total number of studies exceeds 60 as some studies included data from multiple countries

**Table S4a:** Near Miss meta-analysis [N=57 studies]

| Country                                   | Study            | ES    | [95% Conf. Interval] |       | % Weight |
|-------------------------------------------|------------------|-------|----------------------|-------|----------|
| <b>Sub-Saharan Africa</b>                 |                  |       |                      |       |          |
| Angola                                    | Souza 2013       | 0.006 | -0.254               | 0.265 | 0.16     |
| DRC                                       | Souza 2013       | 0.010 | -0.198               | 0.219 | 0.24     |
| Ethiopia                                  | Liyew 2017       | 0.008 | -0.119               | 0.135 | 0.65     |
| Ethiopia                                  | Tura 2018        | 0.017 | -0.156               | 0.191 | 0.35     |
| Ethiopia                                  | Woldeyes 2018    | 0.050 | -0.116               | 0.217 | 0.38     |
| Ghana                                     | Tuncalp 2014     | 0.029 | -0.173               | 0.231 | 0.26     |
| Kenya                                     | Souza 2013       | 0.004 | -0.219               | 0.227 | 0.21     |
| Niger                                     | Souza 2013       | 0.018 | -0.122               | 0.158 | 0.54     |
| Nigeria                                   | Mbachu 2017      | 0.198 | -0.073               | 0.470 | 0.14     |
| Nigeria                                   | Oladapo 2015     | 0.016 | -0.036               | 0.067 | 3.99     |
| Nigeria                                   | Souza 2013       | 0.025 | -0.088               | 0.139 | 0.82     |
| Rwanda                                    | Kalisa 2016      | 0.022 | -0.190               | 0.233 | 0.24     |
| Rwanda                                    | Rulisa 2015      | 0.082 | -0.083               | 0.246 | 0.39     |
| South Africa                              | Iwuh 2018        | 0.006 | -0.179               | 0.191 | 0.31     |
| South Africa                              | Soma-P 2015      | 0.004 | -0.177               | 0.186 | 0.32     |
| Tanzania                                  | Herklots 2017    | 0.009 | -0.313               | 0.331 | 0.10     |
| Tanzania                                  | Litorp 2014      | 0.036 | -0.055               | 0.126 | 1.28     |
| Tanzania                                  | Nelissen 2013    | 0.023 | -0.111               | 0.156 | 0.59     |
| Uganda                                    | Nakimuli 2016    | 0.027 | -0.047               | 0.101 | 1.91     |
| Uganda                                    | Souza 2013       | 0.011 | -0.167               | 0.190 | 0.33     |
| Zimbabwe                                  | Chikadaya 2018   | 0.009 | -0.178               | 0.196 | 0.30     |
| <b>Sub-total I-V pooled ES</b>            |                  | 0.024 | -0.004               | 0.052 | 13.52    |
| <b>Northern Africa &amp; Western Asia</b> |                  |       |                      |       |          |
| Egypt                                     | Bashour 2015     | 0.012 | -0.334               | 0.359 | 0.09     |
| Iraq                                      | Akrawi 2017      | 0.008 | -0.156               | 0.173 | 0.39     |
| Iraq                                      | Jabir 2013       | 0.005 | -0.168               | 0.178 | 0.35     |
| Jordan                                    | Souza 2013       | 0.004 | -0.872               | 0.881 | 0.01     |
| Lebanon                                   | Bashour 2015     | 0.004 | -0.872               | 0.881 | 0.01     |
| Lebanon                                   | Souza 2013       | 0.004 | -0.457               | 0.466 | 0.05     |
| OPT                                       | Bashour 2015     | 0.013 | -0.477               | 0.503 | 0.04     |
| OPT                                       | Souza 2013       | 0.003 | -1.129               | 1.135 | 0.01     |
| Qatar                                     | Souza 2013       | 0.004 | -0.520               | 0.527 | 0.04     |
| Syria                                     | Bashour 2015     | 0.004 | -0.457               | 0.466 | 0.05     |
| Tunisia                                   | El Ghardall 2016 | 0.006 | -0.251               | 0.263 | 0.16     |
| <b>Sub-total I-V pooled ES</b>            |                  | 0.007 | -0.087               | 0.100 | 1.21     |
| <b>Central &amp; Southern Asia</b>        |                  |       |                      |       |          |
| Afghanistan                               | Souza 2013       | 0.017 | -0.079               | 0.112 | 1.16     |
| India                                     | Abha 2016        | 0.015 | -0.120               | 0.150 | 0.58     |
| India                                     | Aziz 2014        | 0.008 | -0.185               | 0.201 | 0.28     |
| India                                     | Kulkarni 2015    | 0.046 | -0.030               | 0.122 | 1.84     |
| India                                     | Nanda 2016       | 0.013 | -0.131               | 0.158 | 0.51     |
| India                                     | Parmar 2016      | 0.021 | -0.289               | 0.331 | 0.11     |
| India                                     | Ps 2013          | 0.018 | -0.154               | 0.189 | 0.36     |
| India                                     | Rathod 2016      | 0.007 | -0.147               | 0.162 | 0.44     |
| India                                     | Reena 2018       | 0.009 | -0.337               | 0.356 | 0.09     |
| India                                     | Souza 2013       | 0.006 | -0.143               | 0.154 | 0.48     |

**Table S4a:** Near Miss meta-analysis [N=57 studies]

|                                          |                       |       |        |       |       |
|------------------------------------------|-----------------------|-------|--------|-------|-------|
| Iran                                     | Ghazivakili 2012      | 0.005 | -0.136 | 0.146 | 0.53  |
| Iran                                     | Naderi 2015           | 0.025 | -0.062 | 0.113 | 1.38  |
| Nepal                                    | Rana 2013             | 0.004 | -0.153 | 0.160 | 0.43  |
| Nepal                                    | Rana 2018             | 0.015 | -0.413 | 0.443 | 0.06  |
| Nepal                                    | Souza 2013            | 0.006 | -0.237 | 0.249 | 0.18  |
| Pakistan                                 | Shahid 2015           | 0.052 | -0.124 | 0.228 | 0.34  |
| Pakistan                                 | Souza 2013            | 0.007 | -0.195 | 0.210 | 0.26  |
| Sri Lanka                                | Souza 2013            | 0.004 | -0.225 | 0.233 | 0.20  |
| <b>Sub-total I-V pooled ES</b>           |                       | 0.022 | -0.012 | 0.055 | 9.21  |
| <b>Eastern &amp; South-Eastern Asia</b>  |                       |       |        |       |       |
| Cambodia                                 | Souza 2013            | 0.013 | -0.242 | 0.268 | 0.16  |
| China                                    | Shen 2013             | 0.004 | -0.232 | 0.240 | 0.19  |
| China                                    | Souza 2013            | 0.003 | -0.334 | 0.339 | 0.09  |
| Japan                                    | Souza 2013            | 0.006 | -0.422 | 0.434 | 0.06  |
| Laos                                     | Luexay 2014           | 0.010 | -0.581 | 0.601 | 0.03  |
| Malaysia                                 | Norhayati 2016        | 0.002 | -0.284 | 0.288 | 0.13  |
| Mongolia                                 | Souza 2013            | 0.008 | -0.243 | 0.259 | 0.17  |
| Philippines                              | Souza 2013            | 0.003 | -0.361 | 0.367 | 0.08  |
| Thailand                                 | Souza 2013            | 0.006 | -0.269 | 0.280 | 0.14  |
| Viet Nam                                 | Souza 2013            | 0.002 | -0.339 | 0.343 | 0.09  |
| <b>Sub-total I-V pooled ES</b>           |                       | 0.006 | -0.090 | 0.102 | 1.14  |
| <b>Latin America &amp; the Caribbean</b> |                       |       |        |       |       |
| Argentina                                | Abalos 2014           | 0.005 | -0.366 | 0.375 | 0.08  |
| Argentina                                | De Mucio 2016         | 0.003 | -1.383 | 1.389 | 0.01  |
| Argentina                                | Karolinsk 2015        | 0.007 | -0.233 | 0.246 | 0.18  |
| Argentina                                | Souza 2013            | 0.005 | -0.269 | 0.280 | 0.14  |
| Brazil                                   | Bastos Dias 2014      | 0.010 | -0.003 | 0.023 | 65.25 |
| Brazil                                   | Cecatti 2011          | 0.013 | -0.127 | 0.154 | 0.53  |
| Brazil                                   | Cecatti 2015          | 0.009 | -0.061 | 0.080 | 2.12  |
| Brazil                                   | Galvao 2014           | 0.005 | -0.219 | 0.228 | 0.21  |
| Brazil                                   | Lobato 2013           | 0.033 | -0.344 | 0.410 | 0.07  |
| Brazil                                   | Madeiro 2015          | 0.010 | -0.252 | 0.271 | 0.15  |
| Brazil                                   | Menezes 2015          | 0.005 | -0.219 | 0.228 | 0.21  |
| Brazil                                   | Morse 2011            | 0.009 | -0.610 | 0.629 | 0.03  |
| Brazil                                   | Oliveira 2013         | 0.013 | -0.110 | 0.136 | 0.70  |
| Brazil                                   | Souza 2013            | 0.002 | -0.473 | 0.478 | 0.05  |
| Brazil                                   | Schwenck 2018         | 0.034 | -0.240 | 0.309 | 0.14  |
| Colombia                                 | De Mucio 2016         | 0.009 | -1.123 | 1.141 | 0.01  |
| DR                                       | De Mucio 2016         | 0.023 | -1.109 | 1.154 | 0.01  |
| Ecuador                                  | Souza 2013            | 0.003 | -0.355 | 0.361 | 0.08  |
| Ecuador                                  | De Mucio 2016         | 0.009 | -1.377 | 1.395 | 0.01  |
| Honduras                                 | De Mucio 2016         | 0.016 | -0.603 | 0.636 | 0.03  |
| Mexico                                   | Esparza-Valencia 2018 | 0.077 | -0.026 | 0.180 | 0.99  |
| Mexico                                   | Souza 2013            | 0.012 | -0.147 | 0.170 | 0.42  |
| Nicaragua                                | Souza 2013            | 0.019 | -0.161 | 0.198 | 0.33  |
| Nicaragua                                | De Mucio 2016         | 0.008 | -0.972 | 0.988 | 0.01  |
| Paraguay                                 | Souza 2013            | 0.002 | -0.691 | 0.695 | 0.02  |
| Paraguay                                 | De Mucio 2016         | 0.006 | -1.380 | 1.392 | 0.01  |
| Peru                                     | Souza 2013            | 0.011 | -0.140 | 0.162 | 0.46  |
| Peru                                     | De Mucio 2016         | 0.035 | -0.556 | 0.626 | 0.03  |

**Table S4a:** Near Miss meta-analysis [N=57 studies]

|                                      |                  |       |              |              |               |
|--------------------------------------|------------------|-------|--------------|--------------|---------------|
| Suriname                             | Verschueren 2018 | 0.010 | -0.337       | 0.356        | 0.09          |
| <b>Sub-total I-V pooled ES</b>       |                  | 0.011 | -0.001       | 0.023        | 72.36         |
| <b>Oceania</b>                       |                  |       |              |              |               |
| Australia                            | Jayaratnam 2016  | 0.005 | -0.615       | 0.625        | 0.03          |
| Australia                            | Jayaratnam 2016  | 0.007 | -0.443       | 0.456        | 0.05          |
| New Zealand                          | Jayaratnam 2016  | 0.006 | -0.469       | 0.481        | 0.05          |
| PNG                                  | Bolnga 2017      | 0.025 | -0.133       | 0.184        | 0.42          |
| PNG                                  | Tanimia 2016     | 0.009 | -0.168       | 0.187        | 0.34          |
| <b>Sub-total I-V pooled ES</b>       |                  | 0.016 | -0.093       | 0.126        | 0.88          |
| <b>Europe &amp; Northern America</b> |                  |       |              |              |               |
| USA                                  | Brown 2011       | 0.048 | -0.031       | 0.127        | 1.68          |
| <b>Sub-total I-V pooled ES</b>       |                  | 0.048 | -0.031       | 0.127        | 1.68          |
| <b>Overall I-V pooled ES</b>         |                  | 0.014 | <b>0.004</b> | <b>0.025</b> | <b>100.00</b> |

**Table S4b:** Test of heterogeneity

| Region                                                    | Degrees of Freedom | P            | I-Squared    | %         |
|-----------------------------------------------------------|--------------------|--------------|--------------|-----------|
| Sub-Saharan Africa                                        | 2.59               | 20           | 1.000        | 0.0%      |
| Northern Africa & Western Asia                            | 0.00               | 10           | 1.000        | 0.0%      |
| Central & Southern Asia                                   | 0.82               | 17           | 1.000        | 0.0%      |
| Eastern & South-Eastern Asia                              | 0.01               | 9            | 1.000        | 0.0%      |
| Latin America & the Caribbean                             | 1.67               | 28           | 1.000        | 0.0%      |
| Oceania                                                   | 0.02               | 4            | 1.000        | 0.0%      |
| Europe & Northern America                                 | 0.00               | 0            | -            | -         |
| <b>Overall</b>                                            | 6.74               | 94           | 1.000        | 0.0%      |
| <b>Overall Test for heterogeneity between sub-groups:</b> | <b>1.62</b>        | <b>6</b>     | <b>0.951</b> | <b>--</b> |
| <b>Significance test of ES=0</b>                          |                    |              |              |           |
| Region                                                    | Z                  | p            |              |           |
| Sub-Saharan Africa                                        | 1.67               | 0.094        |              |           |
| Northern Africa & Western Asia                            | 0.14               | 0.886        |              |           |
| Central & Southern Asia                                   | 1.25               | 0.212        |              |           |
| Eastern & South-Eastern Asia                              | 0.12               | 0.907        |              |           |
| Latin America & the Caribbean                             | 1.82               | 0.069        |              |           |
| Oceania                                                   | 0.30               | 0.768        |              |           |
| Europe & Northern America                                 | 1.19               | 0.236        |              |           |
| <b>Overall</b>                                            | <b>2.75</b>        | <b>0.006</b> |              |           |

**Table S5:** Modifications and adaptations of the WHO MNM criteria [N=20]

| Study                     | Severe Maternal Complications                                                                                                                                                                                                                                                                              | Adaptations                                                                                                                                                                                                                                                                                                                                                                                                                                     |                |                                                             |
|---------------------------|------------------------------------------------------------------------------------------------------------------------------------------------------------------------------------------------------------------------------------------------------------------------------------------------------------|-------------------------------------------------------------------------------------------------------------------------------------------------------------------------------------------------------------------------------------------------------------------------------------------------------------------------------------------------------------------------------------------------------------------------------------------------|----------------|-------------------------------------------------------------|
|                           |                                                                                                                                                                                                                                                                                                            | Life Threatening Conditions (near miss criteria)                                                                                                                                                                                                                                                                                                                                                                                                |                |                                                             |
|                           |                                                                                                                                                                                                                                                                                                            | Criteria removed                                                                                                                                                                                                                                                                                                                                                                                                                                | Criteria added | Modifications made to criteria                              |
| <b>Sub-Saharan Africa</b> |                                                                                                                                                                                                                                                                                                            |                                                                                                                                                                                                                                                                                                                                                                                                                                                 |                |                                                             |
| Benimama 2018 (Rwanda)    | -Uterine infections leading to hysterectomy<br>-Uterine and debridement repair                                                                                                                                                                                                                             | None                                                                                                                                                                                                                                                                                                                                                                                                                                            | None           | Transfusion of blood of $\geq 2$ units orred cells          |
| Herklots 2017 (Tanzania)  | None                                                                                                                                                                                                                                                                                                       | -Lactate $>5$ mmol or $>45$ mg/L<br>-pH $< 7.1$<br>-PAO <sub>2</sub> /FiO <sub>2</sub> $<200$ mmHg                                                                                                                                                                                                                                                                                                                                              | None           | None                                                        |
| Kalisa 2016 (Rwanda)      | Abortion or ectopic pregnancy                                                                                                                                                                                                                                                                              | -Lactate $>5$ mmol or $>45$ mg/L<br>-pH $< 7.1$<br>-PAO <sub>2</sub> /FiO <sub>2</sub> $<200$ mmHg<br>-ketones in urines<br>-dialysis for acute renal failure (ARF)                                                                                                                                                                                                                                                                             | None           | None                                                        |
| Litorp 2014 (Tanzania)    | Cesarean section (CS) complications<br>-complications specific to surgery or anesthesia<br>-complications not specific to surgery or anesthesia but with an increased risk after CS (PPH leading to shock, hysterectomy, blood transfusion)<br>-pre-existing condition that might have affected an outcome | <u>University teaching hospital</u><br>-Lactate $>5$ mmol or $>45$ mg/L<br>-pH $< 7.1$<br>-PAO <sub>2</sub> /FiO <sub>2</sub> $<200$ mmHg<br>- dialysis for ARF<br><br><u>Regional hospital</u><br>-Lactate $>5$ mmol or $>45$ mg/L<br>-pH $< 7.1$<br>-Oxygen saturation $<90\%$ for $> 60$ mins<br>-PAO <sub>2</sub> /FiO <sub>2</sub> $<200$ mmHg<br>-Creatinine $> 300$ mmol/dl or $> 3.5$ mg/dl<br>-bilirubin $>100$ umol/l or $>6.0$ mg/dl | None           | All types of blood products included in massive transfusion |

**Table S5:** Modifications and adaptations of the WHO MNM criteria [N=20]

| Study                    | Severe Maternal Complications | Adaptations                                                                                                                                                                                                                                                                  |                                                                                                                                                                     |                                              |
|--------------------------|-------------------------------|------------------------------------------------------------------------------------------------------------------------------------------------------------------------------------------------------------------------------------------------------------------------------|---------------------------------------------------------------------------------------------------------------------------------------------------------------------|----------------------------------------------|
|                          |                               | Life Threatening Conditions (near miss criteria)                                                                                                                                                                                                                             |                                                                                                                                                                     |                                              |
|                          |                               | Criteria removed                                                                                                                                                                                                                                                             | Criteria added                                                                                                                                                      | Modifications made to criteria               |
|                          |                               | -platelets <50,000<br>-glucose and ketoacids in urine<br>-use of continuous use of vasoactive drugs<br>-dialysis for ARF                                                                                                                                                     |                                                                                                                                                                     |                                              |
| Mbachu 2017 (Nigeria)    | Obstructed labour             | None                                                                                                                                                                                                                                                                         | None                                                                                                                                                                | None                                         |
| Nakamuli 2016 (Uganda)   | None                          | -Uncontrollable fits/status epilepticus                                                                                                                                                                                                                                      | -Hospitalization >7 d<br>-Admission to HDU or ICU<br>-Referral to a more specialized unit<br>-Return to operation theatre<br>-Major operative non-obstetric surgery | Blood transfusion of $\geq 4$ units of blood |
| Nelissen 2013 (Tanzania) | None                          | -Lactate >5 mmol or >45 mg/L<br>-pH < 7.1<br>-PAO <sub>2</sub> /FiO <sub>2</sub> <200 mmHg<br>-Creatinine > 300 mmol/dl or > 3.5 mg/dl<br>-bilirubin >100 umol/l or >6.0mg/dl<br>-glucose and ketoacids in urine<br>-use of continuous vasoactive drugs<br>-dialysis for ARF | None                                                                                                                                                                | Blood transfusion of $\geq 1$ unit of blood  |



**Table S5:** Modifications and adaptations of the WHO MNM criteria [N=20]

| Study                   | Severe Maternal Complications                                                                        | Adaptations                                                                                                                                                                                                                                                                    |                                                                                                                                                                                                                                                                                                                                                                                                                                                     |                                         |
|-------------------------|------------------------------------------------------------------------------------------------------|--------------------------------------------------------------------------------------------------------------------------------------------------------------------------------------------------------------------------------------------------------------------------------|-----------------------------------------------------------------------------------------------------------------------------------------------------------------------------------------------------------------------------------------------------------------------------------------------------------------------------------------------------------------------------------------------------------------------------------------------------|-----------------------------------------|
|                         |                                                                                                      | Life Threatening Conditions (near miss criteria)                                                                                                                                                                                                                               |                                                                                                                                                                                                                                                                                                                                                                                                                                                     |                                         |
|                         |                                                                                                      | Criteria removed                                                                                                                                                                                                                                                               | Criteria added                                                                                                                                                                                                                                                                                                                                                                                                                                      | Modifications made to criteria          |
| Owlabi 2017 (Zambia)    | Incomplete, complete, missed, septic, inevitable or spontaneous abortion hospitalized for > 24 hours | None                                                                                                                                                                                                                                                                           | -muco-cutaneous signs<br>-clinical diagnosis of septicemia or one of the following:<br>t> 39°C, t <36°C,<br>genital infection AND one of the following:<br>systolic BP <90 mmHg, icterus, altered consciousness, oliguria <100 mL in 4h<br>-anemia <4 g/dL<br>-anemia in combination with blood transfusion (4-6.9 g/dL) with blood transfused ≥ 1 unit<br>-uterine output <30 ml/h for 4h or <400 ml/24 h<br>-uterine perforation<br>-bowel injury | Blood transfusion of ≥ 2 units of blood |
| Sayingoza 2017 (Rwanda) | None                                                                                                 | -Lactate >5 mmol or >45 mg/L<br>-pH < 7.1<br>-PAO <sub>2</sub> /FiO <sub>2</sub> <200 mmHg<br>-Creatinine > 300 mmol/dl or > 3.5 mg/dl<br>-bilirubin ≥ 100 umol/l or >6.0mg/dl<br>-glucose and ketoacids in urine<br>-use of continuous -vasoactive drugs<br>-dialysis for ARF | None                                                                                                                                                                                                                                                                                                                                                                                                                                                | Transfusion of ≥ 1 unit of blood        |

**Table S5:** Modifications and adaptations of the WHO MNM criteria [N=20]

| Study                                   | Severe Maternal Complications                                                                                                                                                                                                                                                                                                                                                  | Adaptations                                                                                                                                                                                     |                                                                                             |                                                                                                                     |
|-----------------------------------------|--------------------------------------------------------------------------------------------------------------------------------------------------------------------------------------------------------------------------------------------------------------------------------------------------------------------------------------------------------------------------------|-------------------------------------------------------------------------------------------------------------------------------------------------------------------------------------------------|---------------------------------------------------------------------------------------------|---------------------------------------------------------------------------------------------------------------------|
|                                         |                                                                                                                                                                                                                                                                                                                                                                                | Life Threatening Conditions (near miss criteria)                                                                                                                                                |                                                                                             |                                                                                                                     |
|                                         |                                                                                                                                                                                                                                                                                                                                                                                | Criteria removed                                                                                                                                                                                | Criteria added                                                                              | Modifications made to criteria                                                                                      |
| Tura 2018 (Ethiopia)                    | -Severe malaria<br>-Pulmonary edema<br>-Severe pre-eclampsia with ICU admission                                                                                                                                                                                                                                                                                                | -lactate >5 mmol or >45 mg/L<br>-pH < 7.1<br>-PAO <sub>2</sub> /FiO <sub>2</sub> <200 mmHg<br>-bilirubin > 100 umol/l or >6.0mg/dl<br>- use of continuous vasoactive drugs<br>-dialysis for ARF | None                                                                                        | Transfusion of ≥ 2 units of blood                                                                                   |
| Wittevan 2017 (Malawi & Tanzania)       | None                                                                                                                                                                                                                                                                                                                                                                           | None                                                                                                                                                                                            | None                                                                                        | Transfusion of ≥ 1unit of blood                                                                                     |
| Van den Akker 2013 (Malawi)             | -Uterine rupture after vaginal birth<br>-IUCD leading to laparotomy<br>-Eclampsia or severe pre-eclampsia with maternal indication for termination of pregnancy<br>-Major obstetric hemorrhage (including from complicated abortion and ectopic pregnancies)<br>-Severe obstetric and non-obstetric peripartum infections<br>-Any complications the clinical considered severe | None                                                                                                                                                                                            | None                                                                                        | -Transfusion of ≥ 2 units of blood<br>-Hemoglobin <6 g/dL after vaginal bleeding or an estimated blood loss of > 1L |
| <b>Northern Africa and Western Asia</b> |                                                                                                                                                                                                                                                                                                                                                                                |                                                                                                                                                                                                 |                                                                                             |                                                                                                                     |
| Akrawi 2017 (Iraq)                      | -Severe forms of complications of abortion<br>-Ectopic pregnancy<br>-Abruptio placentae<br>-Placenta previa                                                                                                                                                                                                                                                                    | None                                                                                                                                                                                            | Anemia with Hb <6g/dL or clinical signs of severe anemia in women without severe hemorrhage | Transfusion of ≥ 3 units of bloodproduct                                                                            |

**Table S5:** Modifications and adaptations of the WHO MNM criteria [N=20]

| Study                            | Severe Maternal Complications                                                                                                                                                       | Adaptations                                                                                                                                                                                                                                                                                                                                                                                                                                                           |                                                                                            |                                |
|----------------------------------|-------------------------------------------------------------------------------------------------------------------------------------------------------------------------------------|-----------------------------------------------------------------------------------------------------------------------------------------------------------------------------------------------------------------------------------------------------------------------------------------------------------------------------------------------------------------------------------------------------------------------------------------------------------------------|--------------------------------------------------------------------------------------------|--------------------------------|
|                                  |                                                                                                                                                                                     | Life Threatening Conditions (near miss criteria)                                                                                                                                                                                                                                                                                                                                                                                                                      |                                                                                            |                                |
|                                  |                                                                                                                                                                                     | Criteria removed                                                                                                                                                                                                                                                                                                                                                                                                                                                      | Criteria added                                                                             | Modifications made to criteria |
| <b>Central and Southern Asia</b> |                                                                                                                                                                                     |                                                                                                                                                                                                                                                                                                                                                                                                                                                                       |                                                                                            |                                |
| Kulkarni 2016 (India)            | None                                                                                                                                                                                | None                                                                                                                                                                                                                                                                                                                                                                                                                                                                  | Severe anemia with hemoglobin 60 g/L or clinical signs of severe anemia without hemorrhage | None                           |
| Pandey 2014 (India)              | None                                                                                                                                                                                | -pH < 7.1<br>-PAO <sub>2</sub> /FiO <sub>2</sub> <200 mmHg                                                                                                                                                                                                                                                                                                                                                                                                            | None                                                                                       | None                           |
| Rana 2018 (Nepal)                | Severe PPH ≥ 1000 mL of blood loss (or four fully soaked pads in 30 minutes)<br><br>APH (placenta praevia) requiring blood transfusion<br><br>Obstructed/prolonged labour >18 hours | -continuous vasoactive drugs<br>-CPR<br>- Lactate >5 mmol/l or >45 mg/dl<br>-pH <7.1<br>-intubation and ventilation not related to anaesthesia<br>- PAO <sub>2</sub> /FiO <sub>2</sub> <200 mmHg<br>- dialysis for acute renal failure<br>-Creatinine ≥300 μmol/ml or ≥3.5 mg/dl<br>-massive transfusion of blood or red cells (≥5 units)<br>-platelets <50,000<br>- bilirubin ≥ 100 umol/l or >6.0mg/dl<br>-Uterine haemorrhage or infection leading to hysterectomy |                                                                                            |                                |

**Table S5:** Modifications and adaptations of the WHO MNM criteria [N=20]

| Study                                 | Severe Maternal Complications | Adaptations                                                                                                                                                                                                                                                                                                                                                                                                                                            |                |                                             |
|---------------------------------------|-------------------------------|--------------------------------------------------------------------------------------------------------------------------------------------------------------------------------------------------------------------------------------------------------------------------------------------------------------------------------------------------------------------------------------------------------------------------------------------------------|----------------|---------------------------------------------|
|                                       |                               | Life Threatening Conditions (near miss criteria)                                                                                                                                                                                                                                                                                                                                                                                                       |                |                                             |
|                                       |                               | Criteria removed                                                                                                                                                                                                                                                                                                                                                                                                                                       | Criteria added | Modifications made to criteria              |
| <b>Eastern and South-Eastern Asia</b> |                               |                                                                                                                                                                                                                                                                                                                                                                                                                                                        |                |                                             |
| Luexay 2014 (Lao PDR)                 | None                          | -pH < 7.1<br>-PAO <sub>2</sub> /FiO <sub>2</sub> <200 mmHg<br>-lactate >5 mmol or >45 mg/L<br>-bilirubin ≥ 100 umol/l or >6.0mg/dl<br>-intubation and ventilation not related to anesthesia<br>-continuous use of vasoactive drugs<br>-dialysis for ARF<br>-massive transfusion of blood or PRBCs<br>-CPR<br>-gaspings<br>-failure to form clots<br>-uncontrollable fit/status epilepticus<br>-uterine infection or hemorrhage leading to Hysterectomy | None           | Excessive bleeding per vagina               |
| Shen 2013 (China)                     | None                          | -pH < 7.1<br>-lactate >5 mmol or >45 mg/L<br>-blood transfusion of less than 5 units<br>-intubation related to anesthesia<br>-loss of consciousness for less than 12 hours                                                                                                                                                                                                                                                                             | None           | Pre-eclampsia without jaundice not included |

**Table S5:** Modifications and adaptations of the WHO MNM criteria [N=20]

| Study                             | Severe Maternal Complications | Adaptations                                                                                                                                                                       |                |                                |
|-----------------------------------|-------------------------------|-----------------------------------------------------------------------------------------------------------------------------------------------------------------------------------|----------------|--------------------------------|
|                                   |                               | Life Threatening Conditions (near miss criteria)                                                                                                                                  |                |                                |
|                                   |                               | Criteria removed                                                                                                                                                                  | Criteria added | Modifications made to criteria |
| <b>Oceania</b>                    |                               |                                                                                                                                                                                   |                |                                |
| Bolgna 2017<br>(Papua New Guinea) | None                          | -pH < 7.1<br>-PAO <sub>2</sub> /FiO <sub>2</sub> <200 mmHg<br>-lactate >5 mmol or >45 mg/L<br>- presence of glucose and ketoacids in urine<br>-continuous use of vasoactive drugs | None           | Transfusion ≥3 units of blood  |
| Tanimia 2016<br>(Papa New Guinea) | None                          | -pH < 7.1<br>-PAO <sub>2</sub> /FiO <sub>2</sub> <200 mmHg<br>-lactate >5 mmol or >45 mg/L<br>- presence of glucose and ketoacids in urine<br>-continuous use of vasoactive drugs | None           | Transfusion ≥3 units of blood  |
